# Supplementary material for: PROTAC Bromodomain Inhibitor ARV-825 Displays Anti-Tumor Activity in Neuroblastoma by Repressing Expression of MYCN or c-Myc
Source: PubMed Central journal article supplement (PMC7726414; doi:10.3389/fonc.2020.574525), 2020-11-26
Supplement: Presentation_1.pdf [file Presentation_1.pdf]

## Supplement material

### 1. Sequence

| <b>CRBN shRNA sequence</b>                          |           |                         |
|-----------------------------------------------------|-----------|-------------------------|
| CCGGGCCACGAATAGTTGTCATTTCTCGAGAAATGACAACCTATTCGTGGG |           |                         |
| <b>Primers used in real-time PCR</b>                |           |                         |
| Gene name                                           | Direction | Primer sequence (5'→3') |
| BRD2                                                | F         | CCGTCGAACTCAAGTACAATGG  |
|                                                     | R         | GCTCTGGCGATTGAAAGGTGT   |
| BRD3                                                | F         | TCAAATTGAACCTGCCGGATT   |
|                                                     | R         | TGCATACATTCGCTTGCACTC   |
| BRD4                                                | F         | ACCTCCAACCCTAACAAGCC    |
|                                                     | R         | TTCCATAGTGTCTTGAGCACC   |
| CRBN                                                | F         | TCCTTGAGCTAAGAACACAGTCA |
|                                                     | R         | AAGGCAACACACATTCGGGAA   |
| MYCN                                                | F         | CACAGTGACCACGTCGATTT    |
|                                                     | R         | CACAAGGCCCTCAGTACCTC    |
| c-Myc                                               | F         | TCCCTCCACTCGGAAGGAC     |
|                                                     | R         | CTGGTGCATTTTCGGTTGTTG   |
| HAND2                                               | F         | CAGCAACGACAAGAAAACCA    |
|                                                     | R         | GGATGATTCCAAATGCAAGG    |
| ISL1                                                | F         | GGCATGTTTGAAATGTGCGG    |
|                                                     | R         | ACACAGCGGAAACACTCGAT    |
| PHOX2B                                              | F         | CTTCGCGGAGACTCACTACC    |
|                                                     | R         | CTCCTGCTTGCGAAACTTGG    |
| GATA3                                               | F         | TTCAGTTGGCCTAAGGTGGT    |
|                                                     | R         | CGCCGGACTCTTAGAAGCTA    |
| TBX2                                                | F         | GGCCTTCCACAAGCTGAAG     |
|                                                     | R         | GCGGCTGGTACTTGTGCAT     |
| $\beta$ -actin                                      | F         | AGCGAGCATCCCCAAAGTT     |
|                                                     | R         | GGGCACGAAGGCTCATCATT    |

## 2. Supplement Figure S1

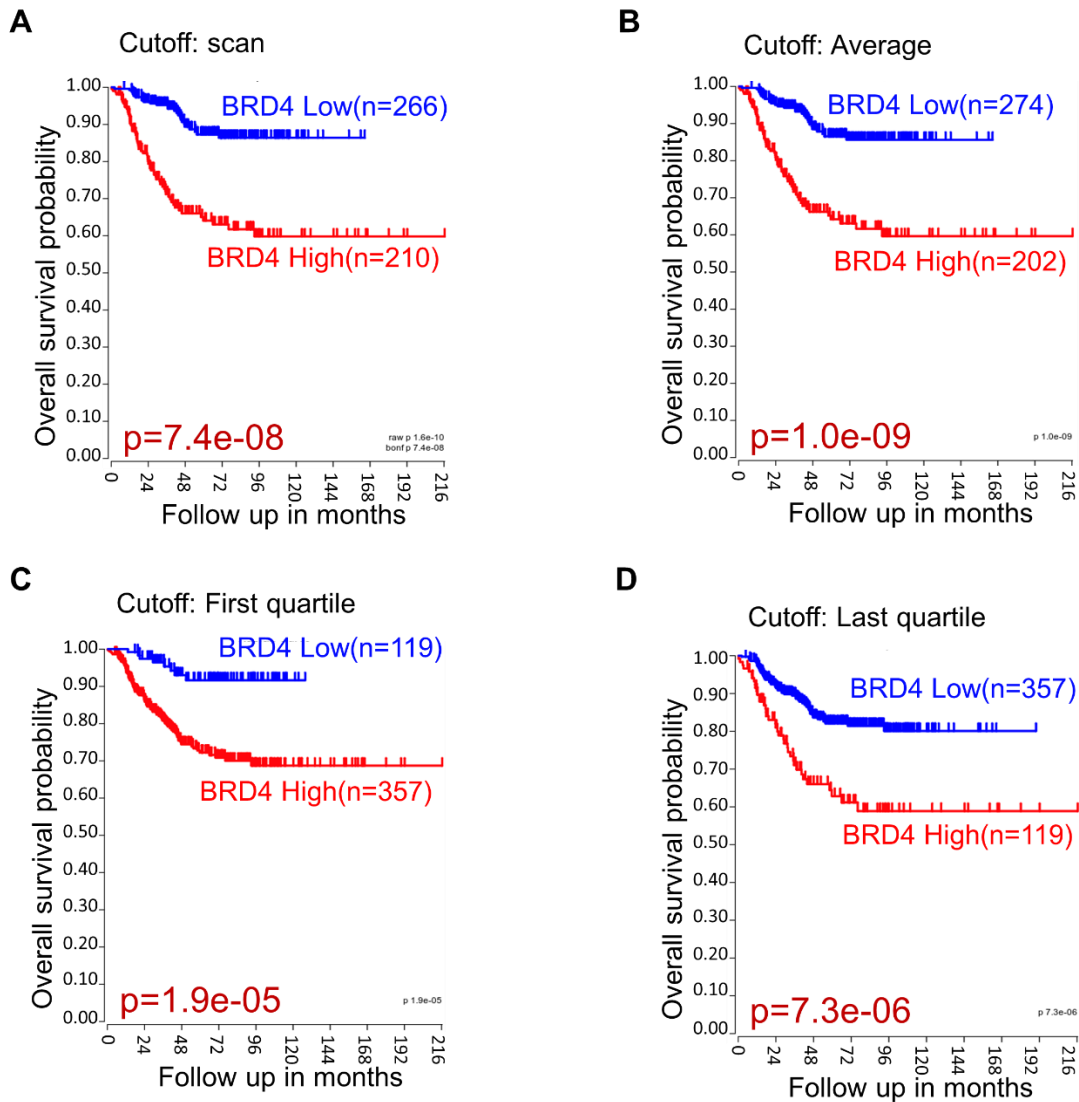

### Supplement Figure S1 High BRD4 indicates poor prognosis of NB patients.

Kaplan-Meier plots generated in R2 platform using Kocak cohort (including 649 NB samples) by applying cutoff value as Scan (A), Average (B), First Quartile (C), and Last Quartile (D) modi.

3. Supplement Figure S2

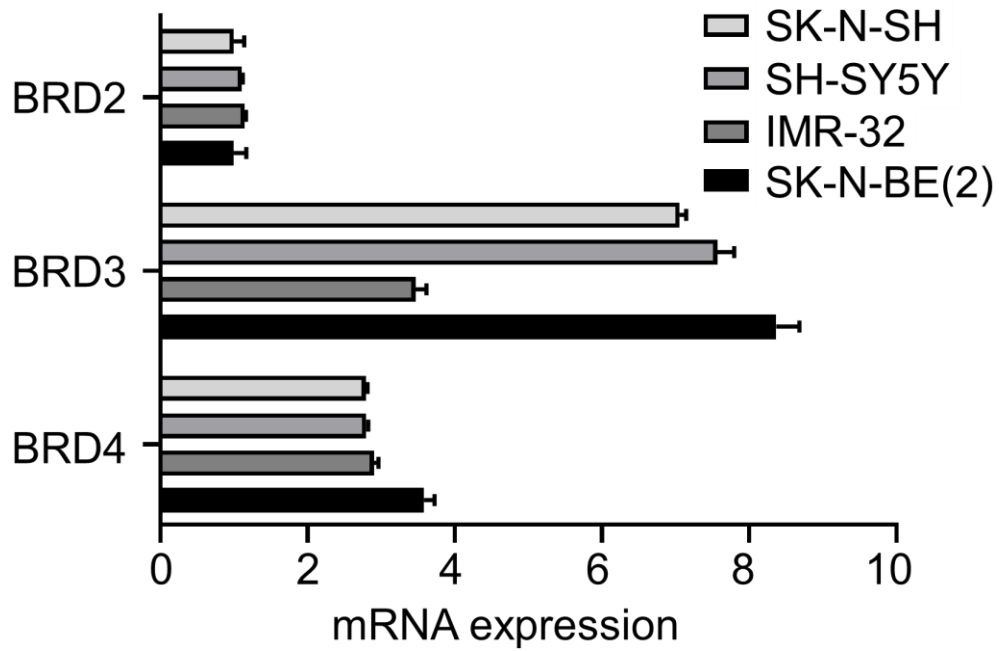

**Supplement Figure S2 mRNA expression level of BET family members in NB cells.**



5. Supplement Figure S4

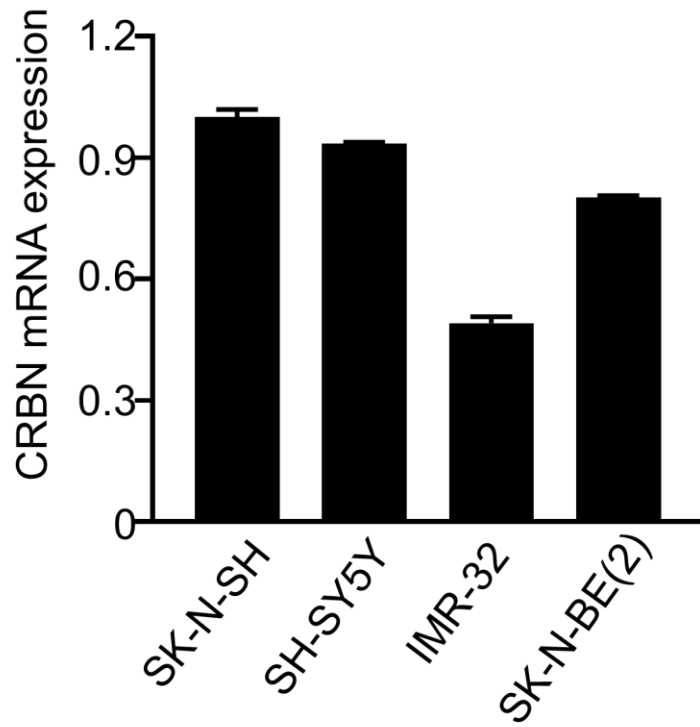

Supplement Figure S4 *CRBN* mRNA expression level in NB cells.

6. Supplement Figure S5

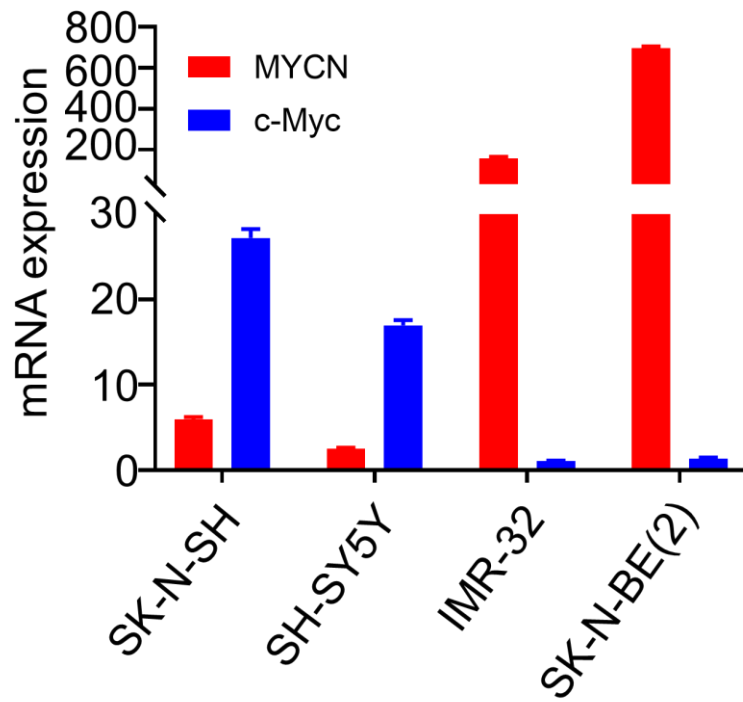

Supplement Figure S5 *MYCN* and *c-Myc* mRNA expression level in NB cells.

7. Supplement Figure S6

| Cell line  | dBET1       | MZ1         | GNE987       |
|------------|-------------|-------------|--------------|
| SK-N-SH    | >10 $\mu$ M | >10 $\mu$ M | >10 $\mu$ M  |
| SH-SY5Y    | >10 $\mu$ M | >10 $\mu$ M | 2.49 $\mu$ M |
| IMR-32     | 518.4nM     | 431.4nM     | 0.27nM       |
| SK-N-BE(2) | 561.0nM     | 119.8nM     | 4.440e-006nM |

**Supplement Figure S6 IC50 of PROTAC BRD4 inhibitors in NB cells.**

## 8. Supplement Figure S7

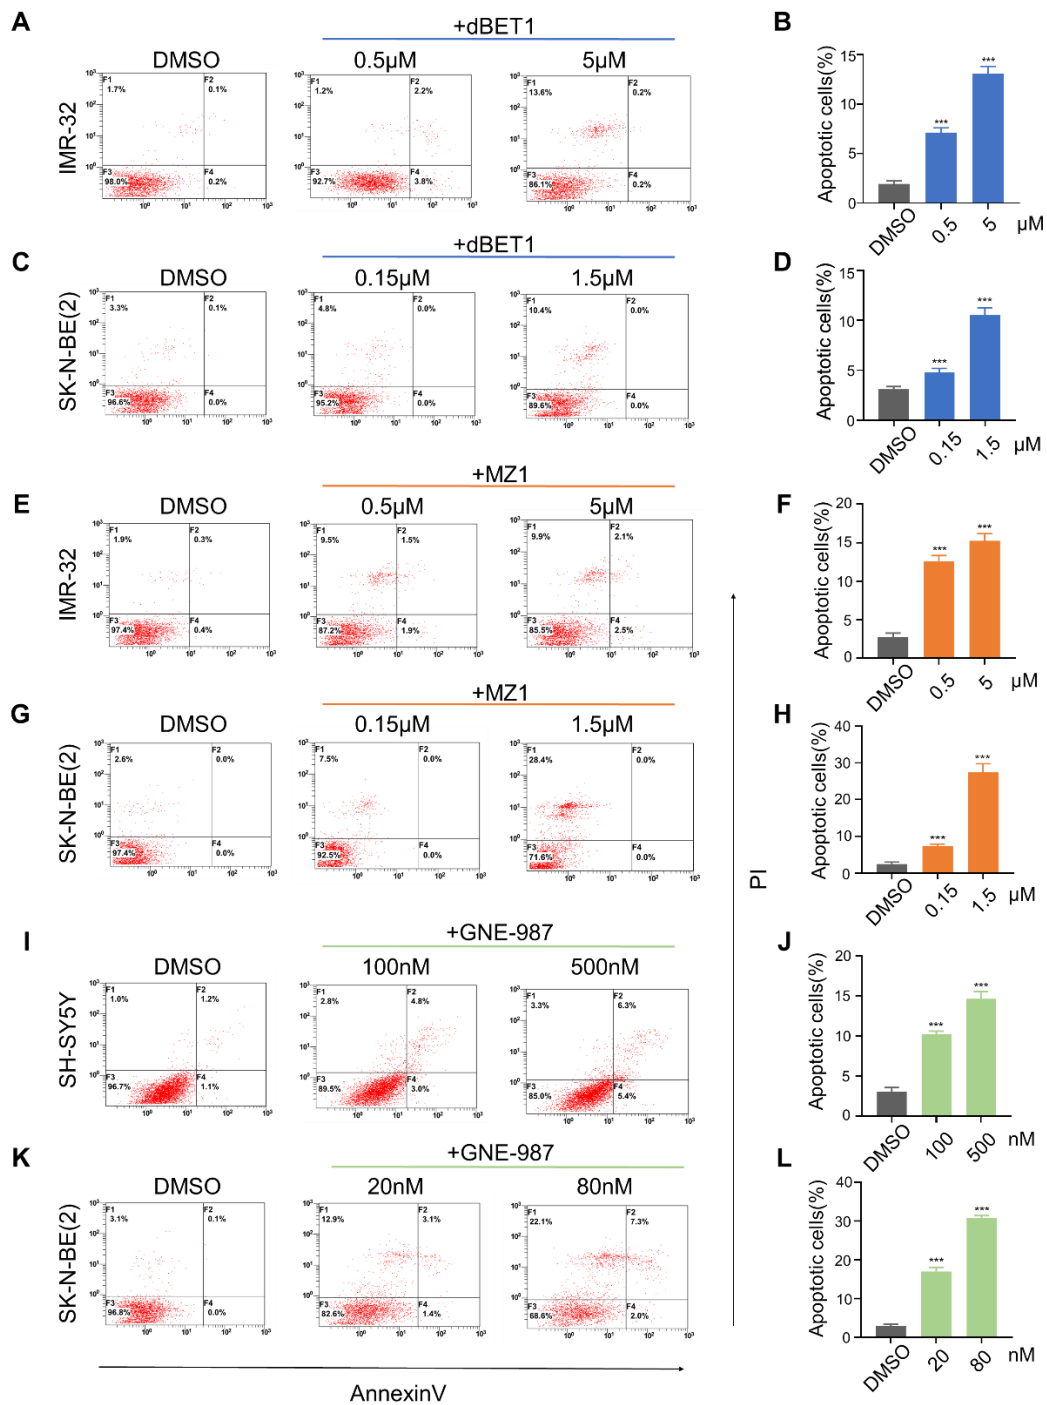

## Supplement Figure S7 PROTAC BRD4 inhibitors induces apoptosis in NB cells.

Annexin V/PI staining showed 72h of PROTAC BRD4 inhibitors treatment induced apoptosis in NB cells.
